# Supplementary material for: ULBP1 Is Elevated in Human Hepatocellular Carcinoma and Predicts Outcome
Source: PubMed Central journal article supplement (PMC7324784; doi:10.3389/fonc.2020.00971), 2020-06-23
Supplement: Table_1.pdf [file Table_1.pdf]

**Supplementary Table 1: Multivariate analysis of risk factors for mortality in UK HCC cohort using age, sex and CLIP score**

| <b>Variable</b>                  | <b>Unadjusted HR</b> | <b>95% CI</b> | <b>p-value</b> | <b>Adjusted HR</b> | <b>95% CI</b> | <b>p-value</b> |
|----------------------------------|----------------------|---------------|----------------|--------------------|---------------|----------------|
| <b>Age (continuous variable)</b> | 1                    | 0.98 - 1.03   | 0.49           | 1.012              | 0.989 - 1.04  | 0.25           |
| <b>Male</b>                      | 1.96                 | 0.95 - 4.73   | 0.09           | 1.58               | 0.74 - 3.91   | 0.27           |
| <b>ULBP1 &gt; 2000pg/ml</b>      | 2.59                 | 1.28 - 4.80   | 0.004          | 2.12               | 0.96 - 4.32   | 0.048          |
| <b>CLIP 1</b>                    | 2.09                 | 1.08 - 4.11   | 0.03           | 1.62               | 0.79 - 3.31   | 0.18           |
| <b>CLIP 2</b>                    | 3.61                 | 1.77 - 7.34   | 0.00035        | 3.34               | 1.61 - 6.90   | 0.001          |
| <b>CLIP 3</b>                    | 8.99                 | 3.22 - 21.85  | 0.000005       | 8.04               | 2.86 - 19.82  | 0.0002         |
| <b>CLIP 4</b>                    | 21.39                | 3.38 - 75.16  | 0.00004        | 21.61              | 3.37 - 78.46  | 0.00006        |

Age, sex, CLIP score and serum ULBP1 >2000pg/ml as a categorical variable were included in a Poisson regression model to calculate multivariate hazard rate ratios for death and associated p values.
